# Supplementary material for: Early Signs of Atherogenic Features in the HDL Lipidomes of Normolipidemic Patients Newly Diagnosed with Type 2 Diabetes
Source: PubMed Central journal article supplement (PMC7700318; doi:10.3390/ijms21228835), 2020-11-22
Supplement: ijms-21-08835-s001.pdf [file ijms-21-08835-s001.pdf]

**Table S1:** Protons and Chemical Shift (in ppm) for the lipid constituents and headgroups identified in HDL lipid extract by NMR and selected signals for Lipid Quantification

| Lipid constituents and headgroups | <sup>1</sup> H NMR signal assignment                                                                  | Chemical Shift (ppm) | Quantification of lipids from selected well-resolved NMR signals                                                                       |
|-----------------------------------|-------------------------------------------------------------------------------------------------------|----------------------|----------------------------------------------------------------------------------------------------------------------------------------|
| <b>Cholesterol molecule</b>       | C <sub>18</sub> H <sub>3</sub>                                                                        | 0.68                 | <b>Total Cholesterol, FC, CE</b>                                                                                                       |
|                                   | C <sub>26</sub> H <sub>3</sub> , C <sub>27</sub> H <sub>3</sub> , C <sub>21</sub> H                   | 0.87                 |                                                                                                                                        |
|                                   | C <sub>19</sub> H <sub>3</sub>                                                                        | 1.00                 |                                                                                                                                        |
|                                   | C <sub>3</sub> H                                                                                      | 3.40                 |                                                                                                                                        |
|                                   | C <sub>6</sub> H                                                                                      | 5.36                 |                                                                                                                                        |
| <b>Glycerol backbone</b>          | C <sub>1</sub> H <sup>u</sup> and C <sub>3</sub> H <sup>u</sup> of glycerol backbone of TG and DAGPLs | 4.16                 | <b>TG</b>                                                                                                                              |
|                                   | C <sub>1</sub> H <sup>d</sup> and C <sub>3</sub> H <sup>d</sup> of glycerol backbone of TG            | 4.32                 |                                                                                                                                        |
|                                   | C <sub>1</sub> H <sup>d</sup> and C <sub>3</sub> H <sup>d</sup> of glycerol backbone of DAGPLs        | 4.40                 | <b>Ether GPLs</b><br><b>Total Diacyl glycerophospholipids (DAGPLs)</b>                                                                 |
|                                   | C <sub>2</sub> H of glycerol backbone in ether glycerophospholipids                                   | 5.15                 |                                                                                                                                        |
|                                   | C <sub>2</sub> H of glycerol backbone in total DAGPLs                                                 | 5.18                 |                                                                                                                                        |
|                                   | C <sub>2</sub> H of glycerol backbone in TG                                                           | 5.22                 |                                                                                                                                        |
| <b>Sphingosine moiety</b>         | -CH <sub>2</sub> -CH=CHCHOH                                                                           | 5.40                 | <b>Total SLs</b>                                                                                                                       |
|                                   | -CH <sub>2</sub> -CH=CHCHOH                                                                           | 5.70                 |                                                                                                                                        |
| <b>Head-group and substituent</b> | -CH <sub>2</sub> -CH <sub>2</sub> -N <sup>+</sup> (CH <sub>3</sub> ) <sub>3</sub> (choline)           | 3.20                 | <b>Total choline-containing PLs (PC, SM, LPC)</b>                                                                                      |
|                                   | -CH <sub>2</sub> -CH <sub>2</sub> -N <sup>+</sup> (CH <sub>3</sub> ) <sub>3</sub>                     | 3.59                 |                                                                                                                                        |
|                                   | -CH <sub>2</sub> -CH <sub>2</sub> -N <sup>+</sup> (CH <sub>3</sub> ) <sub>3</sub>                     | 4.24                 | <b>PE</b><br><b>PLA (ether GPLs)</b>                                                                                                   |
|                                   | -CH <sub>2</sub> -CH <sub>2</sub> -NH <sub>3</sub> <sup>+</sup> (ethanolamine)                        | 3.10                 |                                                                                                                                        |
|                                   | -OCH=CHCH <sub>2</sub>                                                                                | 5.90                 |                                                                                                                                        |
| <b>Fatty acid chains</b>          | ω-CH <sub>3</sub> (methyl) in fatty acyl chains                                                       | 0.88                 | <b>AA (20:4 ω-6) + EPA (20:5 ω-3)</b><br><b>UFA</b><br><b>Total FA</b><br><b>DHA (22:6 ω-3)</b><br><b>LA (18:2 ω-6)</b><br><b>PUFA</b> |
|                                   | ω-CH <sub>3</sub> (methyl) of total omega-3 FA                                                        | 0.95                 |                                                                                                                                        |
|                                   | -(CH <sub>2</sub> ) <sub>n</sub> - (methylene) in fatty acyl chains                                   | 1.30                 |                                                                                                                                        |
|                                   | -CO-CH <sub>2</sub> -CH <sub>2</sub> - (β-methylene) in the fatty acyl chains                         | 1.59                 |                                                                                                                                        |
|                                   | β-CH <sub>2</sub> (β-methylene) of the sum of AA+EPA                                                  | 1.67                 |                                                                                                                                        |
|                                   | -CH <sub>2</sub> -CH= (allylic) in fatty acyl chains                                                  | 2.04                 |                                                                                                                                        |
|                                   | -CO-CH <sub>2</sub> (α-methylene) in the fatty acyl chains                                            | 2.30                 |                                                                                                                                        |
|                                   | α and β CH <sub>2</sub> (methylene) of DHA                                                            | 2.38                 |                                                                                                                                        |
|                                   | -CH=CH-CH <sub>2</sub> -CH=CH- of linoleic acid                                                       | 2.75                 |                                                                                                                                        |
|                                   | -(CH=CH-CH <sub>2</sub> -CH=CH) <sub>n</sub> , n > 1 in the fatty acyl chains                         | 2.80                 |                                                                                                                                        |
|                                   | -CH=CH- in the fatty acyl chains                                                                      | 5.36                 |                                                                                                                                        |

**Key** AA, arachidonic acid; CE, cholesteryl ester; DAGPLs, Diacyl glycerophospholipids; DHA, docosahexaenoic acid; EPA, eicosapentaenoic acid; FA, fatty acids; FC, free cholesterol; GPLs, glycerophospholipids; LA, Linoleic acid; LPC, lysophosphatidylcholine; PC, phosphatidylcholine; PE, phosphatidylethanolamine; PLA, plasmalogens; PUFA, polyunsaturated fatty acids; SLs, Sphingolipids; SM, sphingomyelin; TG, triglycerides; UFA, Unsaturated fatty acids.
